# Supplementary material for: PBP2b plays a key role in both peripheral growth and septum positioning in Lactococcus lactis
Source: PubMed Central journal article supplement (PMC5965867; doi:10.1371/journal.pone.0198014), 2018-05-23
Supplement: pone.0198014.s005.pdf [file pone.0198014.s005.pdf]

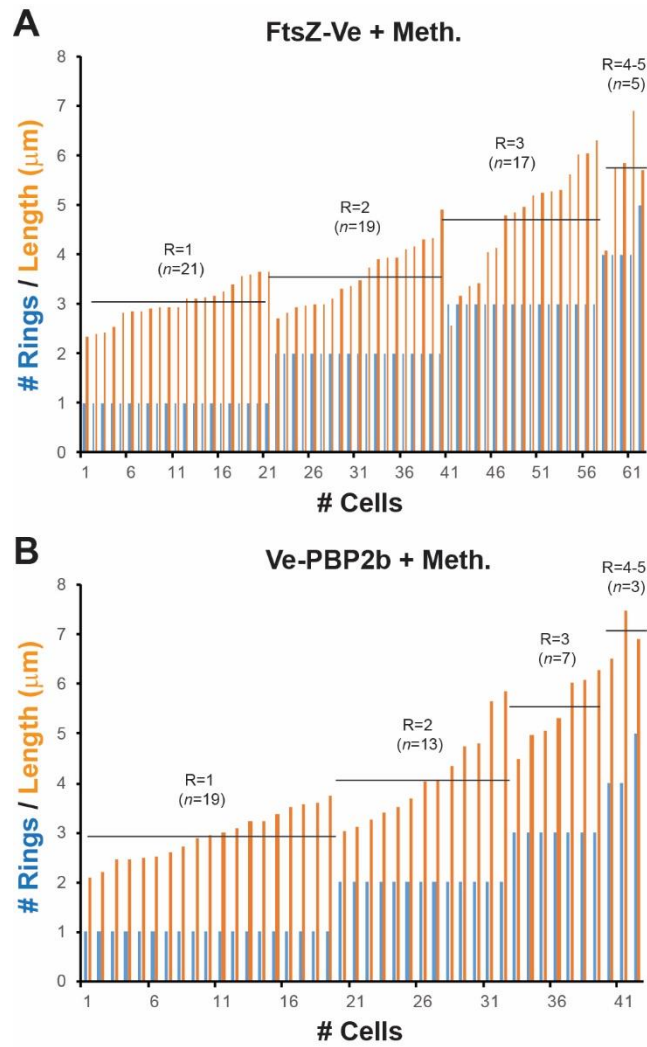

**S5 Fig. Distribution of FtsZ and PBP2b rings according to filament length.** *L. lactis* cells expressing FtsZ-Ve (strain NZ3900 [pGIBLD031]) (A) or Ve-PBP2b (strain NZ3900 [pGIBLD041]) (B) were grown in the presence of methicillin  $1 \mu\text{g ml}^{-1}$  to induce filament formation and visualized by optical microscopy. Length ( $\mu\text{m}$ , orange bars) and ring number (R=1 to 5, blue bars) of filaments ( $n = 62$  and  $42$ , respectively) were measured from phase contrast and fluorescence images, respectively. Black bar, mean length value for each filament subpopulation separated by increased ring numbers. Microscopy images were analyzed with AxioVision.
