# Supplementary material for: PBP2b plays a key role in both peripheral growth and septum positioning in Lactococcus lactis
Source: PubMed Central journal article supplement (PMC5965867; doi:10.1371/journal.pone.0198014), 2018-05-23
Supplement: pone.0198014.s006.pdf [file pone.0198014.s006.pdf]

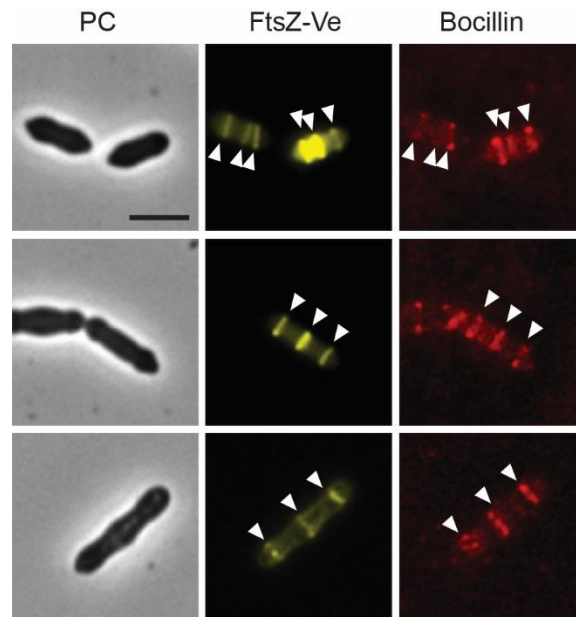

**S6 Fig. Localization of PBPs with respect to FtsZ in methicillin-induced filaments.** Filaments expressing FtsZ-Ve (strain NZ3900 [pGIBLD031]) were stained with Bocillin™650/665 and visualized by phase contrast (PC) and epifluorescence (FtsZ-Ve and Bocillin) microscopy. White arrows indicate bands of FtsZ-Ve/PBP co-localization.
