# Supplementary material for: PBP2b plays a key role in both peripheral growth and septum positioning in Lactococcus lactis
Source: PubMed Central journal article supplement (PMC5965867; doi:10.1371/journal.pone.0198014), 2018-05-23
Supplement: pone.0198014.s009.pdf [file pone.0198014.s009.pdf]

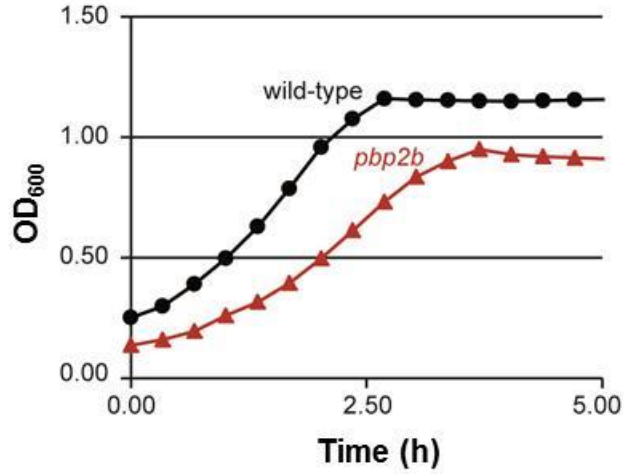

**S9 Fig. Growth defect of the *pbp2b* mutant.** Growth curves of wild-type and *pbp2b* mutant cells were grown in M17G supplemented with  $5\mu\text{g ml}^{-1}$  of erythromycin when appropriate. For each strain, the  $OD_{600}$  was monitored every 20 min. The growth curves presented are representative of various independent experiments.
