# Supplementary material for: PBP2b plays a key role in both peripheral growth and septum positioning in Lactococcus lactis
Source: PubMed Central journal article supplement (PMC5965867; doi:10.1371/journal.pone.0198014), 2018-05-23
Supplement: pone.0198014.s010.pdf [file pone.0198014.s010.pdf]

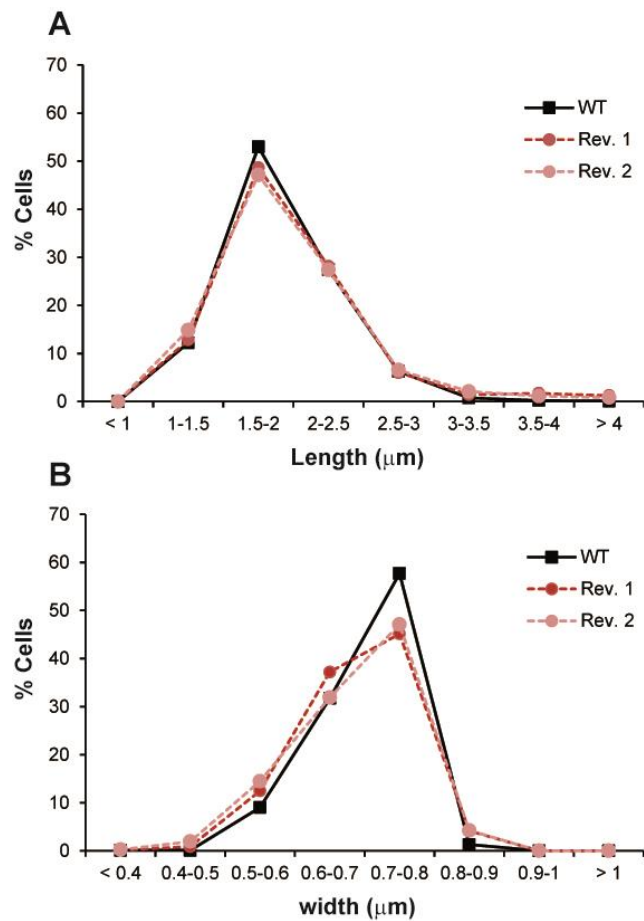

**S10 Fig. Cell length and width of WT compared to revertants of the *pbp2b* mutant.** The *pbp2b* mutant was grown in M17G without antibiotics during 20 generations. Two erythromycin sensitive clones (rev. 1 and rev. 2) resulting from excision of the disruptive vector from the *pbp2b* locus were selected. Cell length and width were measured from microscopy images using MicrobeTracker ( $n > 50$  cells).
