# Supplementary material for: PBP2b plays a key role in both peripheral growth and septum positioning in Lactococcus lactis
Source: PubMed Central journal article supplement (PMC5965867; doi:10.1371/journal.pone.0198014), 2018-05-23
Supplement: pone.0198014.s011.pdf [file pone.0198014.s011.pdf]

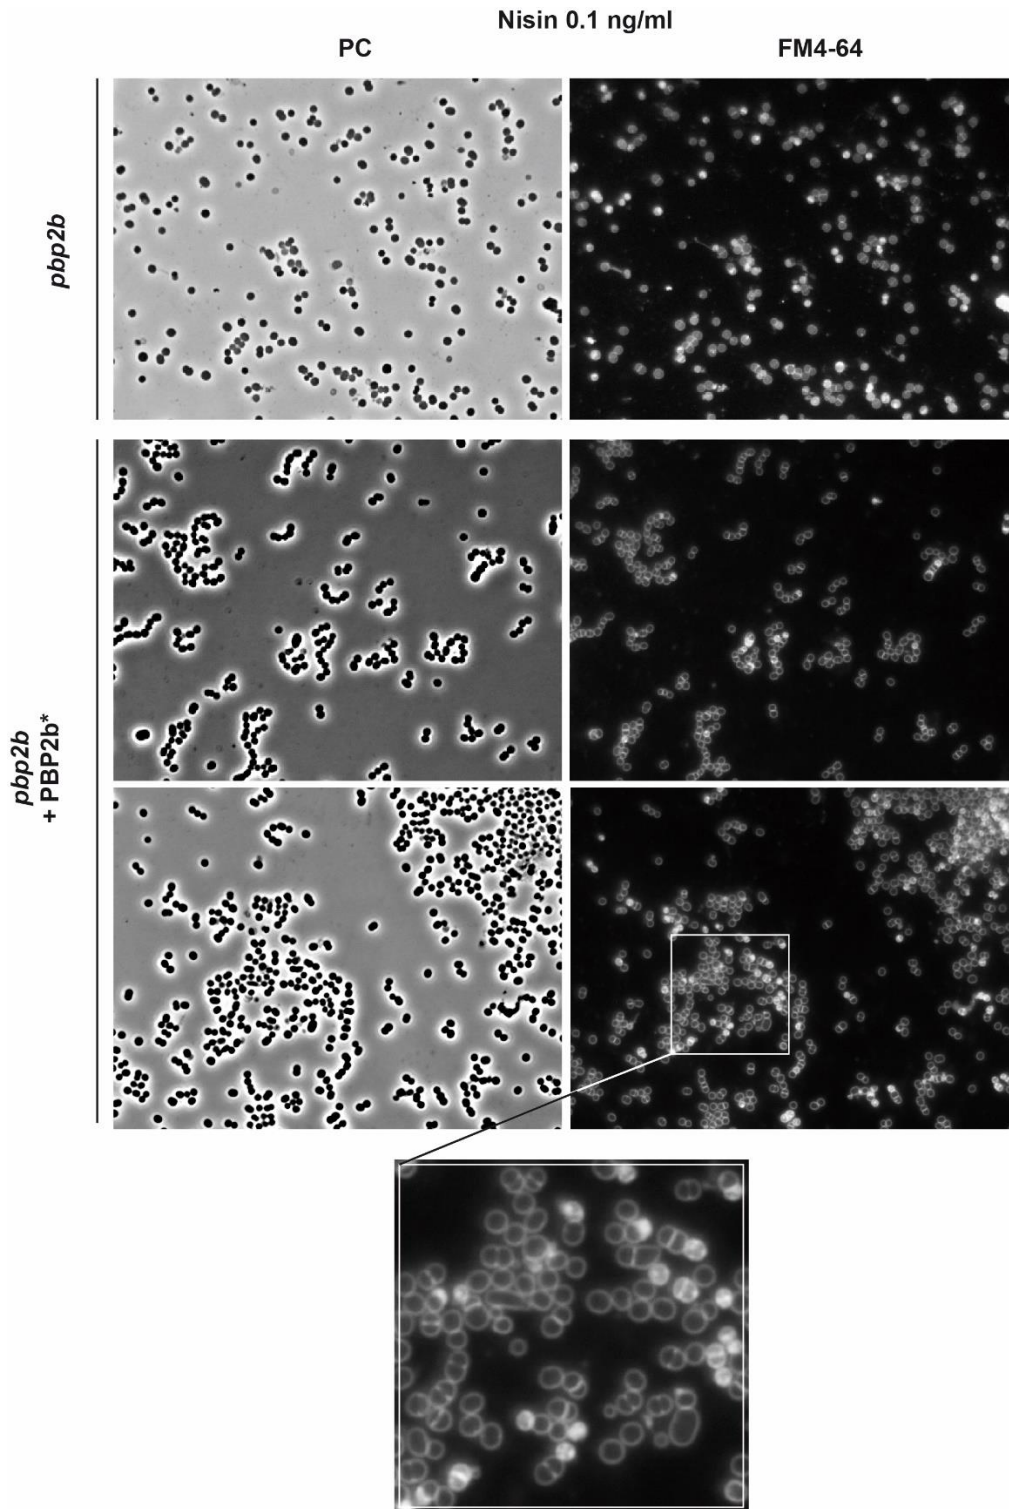

**S11 Fig. Complementation assay of the *pbp2b* mutant with the catalytic mutant of PBP2b (PBP2b\*) in presence of nisin 0.1 ng ml<sup>-1</sup>.** Images of *pbp2b* mutant and *pbp2b* + PBP2b\* cells obtained by phase contrast (PC) and epifluorescence (membrane staining with FM4-64) microscopy.
