# Supplementary material for: PBP2b plays a key role in both peripheral growth and septum positioning in Lactococcus lactis
Source: PubMed Central journal article supplement (PMC5965867; doi:10.1371/journal.pone.0198014), 2018-05-23
Supplement: pone.0198014.s012.pdf [file pone.0198014.s012.pdf]

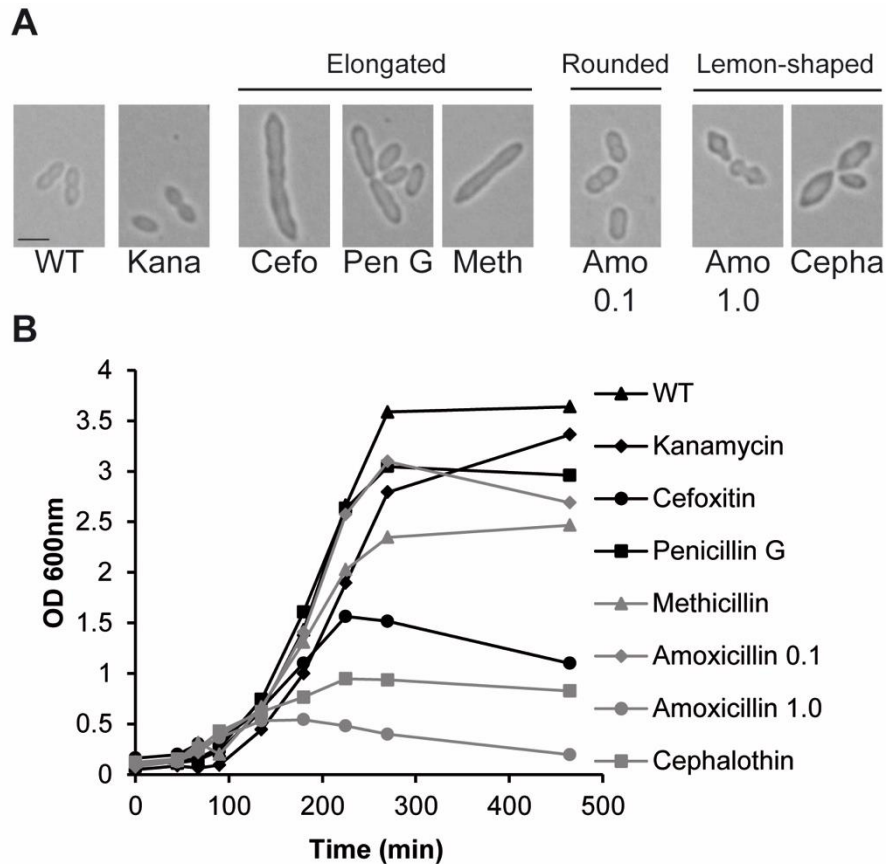

**S12 Fig. Screen for  $\beta$ -lactams affecting cell elongation or division in *L. lactis*.** (A) Micrographs of NZ3900 cells untreated (WT) or treated with  $12 \mu\text{g ml}^{-1}$  of kanamycin (Kana, control),  $64 \mu\text{g ml}^{-1}$  of cefoxitin (Cefo),  $0.1 \mu\text{g ml}^{-1}$  of penicillin G (Pen G),  $1 \mu\text{g ml}^{-1}$  of methicillin (Meth),  $0.1 \mu\text{g ml}^{-1}$  of amoxicillin (Amo 0.1),  $1 \mu\text{g ml}^{-1}$  of amoxicillin (Amo 1.0), and  $10 \mu\text{g ml}^{-1}$  of cephalosporin C (Cepha). Cells were collected in early exponential growth and observed in bright field microscopy. Scale bar:  $2 \mu\text{m}$ . (B) Growth curves of NZ3900 cells untreated or treated with antibiotics as reported in panel A.
