# Supplementary material for: PBP2b plays a key role in both peripheral growth and septum positioning in Lactococcus lactis
Source: PubMed Central journal article supplement (PMC5965867; doi:10.1371/journal.pone.0198014), 2018-05-23
Supplement: pone.0198014.s014.pdf [file pone.0198014.s014.pdf]

**S1 Table. Primers used for cloning and validation.**

| Primer                                                                          | Sequence (5' to 3')                                | Mutant strain or plasmid |
|---------------------------------------------------------------------------------|----------------------------------------------------|--------------------------|
| <b>Primers used for the validation of <i>pbp</i> disruption</b>                 |                                                    |                          |
| BID-PBP1aUpNcoI                                                                 | aaccATGgTGGTTAATGCTG                               | BLD001                   |
| BID-PBP1aDownSacI                                                               | agagctcATTTAGCCACCATTAGC                           |                          |
| BID-PBP1bUpNcoI                                                                 | aaccATGgAAAAAGACTCAATTG                            | BLD002                   |
| BID-PBP1bDownSacI                                                               | agagctcTTAGTTACTTTTTGATGAGG                        |                          |
| BID-PBP2aUpPciI                                                                 | aaaaaacATGtCTGAAAATAAG                             | BLD003                   |
| BID-PBP2aDownSacI                                                               | agagctcTTAGTTGCCAAAAACC                            |                          |
| BID-PBP2bUpNcoI                                                                 | aaccATGgCAGTTAATAAAAAG                             | BLD004                   |
| BID-PBP2bDownXbaI                                                               | atctagaTTAATTTGTTTCGAAAAGC                         |                          |
| BID-DacAUpNcoI                                                                  | aaccATGgAAAAAATTGCAATTATTTTTTG                     | BLD006                   |
| BID-DacADownSacI                                                                | agagctcTTAGAGTTTTTCATTAAC                          |                          |
| <b>Primers used for the construction of expression vectors</b>                  |                                                    |                          |
| BID-PBP2bUpNcoI                                                                 | aaccATGgCAGTTAATAAAAAG                             | pGIBLD027                |
| BID-PBP2bDownXbaI                                                               | atctagaTTAATTTGTTTCGAAAAGC                         |                          |
| PBP2B*Up                                                                        | AGGGgCTGTTGTGAAAATGGGAACATTG                       | pGIBLD0271               |
| PBP2B*Down                                                                      | CCATTTTCACAACAGcCCCTGGCGTAAAGAC                    |                          |
| MBO-FtsZUp4X4                                                                   | ATATAC <u>ATGTGGCC</u> ATGGAATTTTCATTTGATACAGACTTA | pGIBLD031                |
| MBO-FtsZDown4X4                                                                 | <u>ATCTAGAT</u> AGATTAATTTTACGGAAGAATGGTGG         |                          |
| BID-PBP2bUp4X4                                                                  | ATATAC <u>ATGTGGCC</u> ATGGCAGTTAATAAAAAGAAAAAAC   | pGIBLD041                |
| BID-PBP2bDown4X4                                                                | <u>ATCTAGA</u> ATTTGTTTCGAAAAGCTTCGTT              |                          |
| <b>Primers used for the validation of the acquisition of expression vectors</b> |                                                    |                          |
| MBO-4X4UpOI1                                                                    | TTTGTTAGATACAATGATTTTCG                            | pNZ8048 and derivatives  |
| MBO-4X4DownOI2                                                                  | TCAAGCCTTGGTTTTCTAATTTTGG                          |                          |

<sup>a</sup> Underlined sequences correspond to restriction enzymes sites.
